# Supplementary material
Source: publisher site journal article supplement (https://en-cdn.bio-protocol.org/attached/file/20180527/2870%20Supplemental%20file%20TSP%20data%20example.xlsx)
Supplement: Supplementary file 1 [file 2870%20Supplemental%20file%20TSP%20data%20example.xlsx]

## Sheet: Sheet1
				Target Visits
	Subject #	Configuration	# of targets	1	2	3	4	5	6	7	8	9	10	11	12	13		Latency (sec)	Total visits	Total Travel Distance	Re-visits	Omissions	Span	Percent above optimal	Proportion of Optimal Transitions	Proportin of Distance on Optimal			Transitions
	1	1	4	1	4	2	1	4	3									29	6	27	1	0	4	1.19512	0.8	0.82			14	42	21	14	43
	2	1	4	2	3	2	4	3	1									31	6	22	2	0	2	0.788618	0.6	0.59			23	32	24	43	31
	3	2	6	5	2	1	1	2	6	4	5	3						51	9	22	1	0	4	0.571429	0.5	0.57			52	21	11	12	26	64	45	53
	4	2	6	1	2	5	6	1	3	4	5	6	1	2				33	11	35	4	0	4	1.5	0.75	0.68			12	25	56	61	13	34	45	56
				higlighted cells indicate bait retrieval
				no highlight indicates a contact with no retrieval
				the number signifies the target number that was contacted
